# Supplementary material for: Next Generation Sequencing of free pathogenic DNA in blood samples of a critically-ill pediatric population: A single-center experience Short title: NGS of pathogenic cfDNA in critically ill children
Source: Research Square preprint supplement (doi:10.21203/rs.3.rs-8133441/v1), 2025-11-28
Supplement: Supplementary file 1 [file 0521556390dcb6478e053826.docx]

**Tables**

**Table 1 - Demographic and clinical characteristics**

| **Characteristic** | **Overall**  N = 1111 | **negative NGS**  N = 511 | **positive NGS**  N = 601 |
| --- | --- | --- | --- |
| Median age; years | 10.3 (4.5, 12.9) | 8.6 (3.4, 12.5) | 11.2 (5.3, 13.7) |
| C-reactive protein, mg/dl | 5.0 (1.4, 11.1) | 3.0 (0.7, 10.6) | 6.0 (2.0, 15.1) |
| Procalcitonin, ng/ml | 0.2 (0.0, 1.7) | 0.2 (0.0, 1.0) | 0.1 (0.0, 2.6) |
| Antibiotic therapy at time of NGS | 66 (60%) | 26 (52%) | 40 (67%) |
| Underlying diagnosis |  |  |  |
| Immune compromised | 24 (22%) | 9 (18%) | 15 (25%) |
| Oncological | 43 (39%) | 15 (29%) | 28 (47%) |
| Other1 | 21 (19%) | 12 (24%) | 9 (15%) |
| None | 23 (21%) | 15 (29%) | 8 (13%) |
| Indication for NGS-testing |  |  |  |
| SIRS of unknown origin | 96 (86%) | 44 (86%) | 52 (87%) |
| Suspected infection with a rare germ | 12 (11%) | 4 (7.8%) | 8 (13%) |
| Control | 3 (2.7%) | 3 (5.9%) | 0 (0%) |
| Blood-cultures |  |  |  |
| Positive | 7 (8.4%) | 2 (5.1%) | 5 (11%) |
| Negative | 76 (92%) | 37 (95%) | 39 (89%) |
| Urine-cultures |  |  |  |
| Positive | 10 (18%) | 4 (14%) | 6 (21%) |
| Negative | 47 (82%) | 25 (86%) | 22 (79%) |
| PCR detection of virus in blood |  |  |  |
| Positive | 15 (52%) | 4 (27%) | 11 (79%) |
| Negative | 14 (48%) | 11 (73%) | 3 (21%) |
| Broncho-alveolar lavage |  |  |  |
| Positive | 2 (67%) | 0 (0%) | 2 (100%) |
| Negative | 1 (33%) | 1 (100%) | 0 (0%) |
| Clinical impact |  |  |  |
| Confirmation of diagnosis | 7 (6.3%) | 2 (3.9%) | 5 (8.3%) |
| Therapy control | 29 (26%) | 6 (12%) | 23 (38%) |
| Discontinuation of anti-infective therapy | 45 (41%) | 26 (51%) | 19 (32%) |
| No start of anti-infective therapy | 33 (30%) | 19 (37%) | 14 (23%) |
| Start of specific anti-infective therapy | 8 (7.2%) | 0 (0%) | 8 (13%) |
| 1Median (Q1, Q3); n (%) | | | |
| Diagnoses classified under others were: JIA, cystic fibrosis, BPD, Morbus Crohn, unknown congenital disorder, epileptic encephalopathy, myopathy, hypoxic-ischaemic encephalopathy, short bowel syndrome, sickle cell anemia. | | | |

**Table 2 - Microbes identified by NGS; Numbers indicate counts of detections across tests. Group A = bacteria, Group B = viruses, Group C = fungi, Group D = parasites**

| Group | Species |
| --- | --- |
| Bacteria | *Enterococcus faecium* (14), *Staphylococcus epidermidis* (5), *Burkholderia contaminans* (3), *Haemophilus influenzae* (3), *Escherichia coli* (2), *Fusobacterium nucleatum* (2), *Pseudomonas aeruginosa* (2), *Serratia marcescens* (2), *Bacteroides fragilis* (1), *Bacteroides stercoris* (1), *Cutibacterium acnes* (1), *Flavonifractor plautii* (1), *Haemophilus parainfluenzae* (1), *Klebsiella pneumoniae* (1), *Kocuria palustris* (1), *Lactobacillus sakei* (1), *Moraxella osloensis* (1), *Mycobacterium chimaera* (1), *Parabacteroides merdae* (1), *Parvimonas micra* (1), *Phocaeicola vulgatus* (1), *Prevotella oris* (1), Propionibacterium sp. oral taxon 193 (1), *Pseudomonas protegens* (1), *Staphylococcus aureus* (1), *Staphylococcus hominis* (1), *Streptococcus gordonii* (1) |
| Viruses | Human gammaherpesvirus 4 (8), Human betaherpesvirus 5 (7), Human mastadenovirus c (5), Torque teno virus 10 (5), Human polyomavirus 1 (4), Human alphaherpesvirus 3 (2), Human betaherpesvirus 6b (2), Torque teno virus 13 (2), Torque teno virus 19 (2), Adenovirus 1 (1), Adenovirus 5 (1), Torque teno virus 11 (1), Torque teno virus 16 (1), Torque teno virus 22 (1), Torque teno virus 24 (1) |
| Fungi | *Aspergillus fumigatus* (3), *Candida dubliniensis* (1) |
| Parasites | *Enterocytozoon bieneusi* (3), *Leishmania donovani* (1), *Leishmania infantum* (1) |

**Table 3** - **Comparison of NGS with conventional diagnostics. Panels A = bacteria; B = viruses; C = only relevant bacteria; D = only relevant viruses.**

|  | **A - Only Bacteria** | | **B - Only Viruses** | |
| --- | --- | --- | --- | --- |
|  | Conventional diagnostics positive | Conventional diagnostics negative | Conventional diagnostics positive | Conventional diagnostics negative |
| NGS positive | 4 | 38 | 7 | 17 |
| NGS negative or different pathogen | 3 | 67 | 5 | 83 |
|  | **C - Only Relevant Bacteria*** | | **D - Only Relevant Viruses*** | |
| NGS positive | 3 | 22 | 4 | 11 |
| NGS negative or different pathogen | 1 | 14 | 1 | 24 |

*Relevant organisms were defined as NGS-detected species judged clinically significant based on infection focus, patient context, and inflammatory response by pediatric infectious disease specialist, excluding typical contaminants or commensals.
